# Supplementary material
Source: PubMed Central journal article supplement (PMC6553509)
Supplement: atv-39-1149-s002.pdf [file atv-39-1149-s002.pdf]

## Major Resources Tables

## Animals (in vivo studies)

| Species | Vendor or Source                              | Background Strain                                                                                        | Sex    |
|---------|-----------------------------------------------|----------------------------------------------------------------------------------------------------------|--------|
| Mouse   | Clevers lab (Snippert HJ et al., Cell 2010)   | <i>Confetti</i> : Mixed background C56Bl/6 & 129P2/OlaHsd-derived IB10/E14IB10 embryonic stem (ES) cells | Female |
| Mouse   | Offermans lab (Wirth A et al., Nat Med 2008)  | <i>Myh11-CreERT2</i> : C57Bl/6                                                                           | Male   |
| Mouse   | Charles River                                 | <i>ApoE</i> <sup>-/-</sup> : C57Bl/6                                                                     | Male   |
| Mouse   | In house breeding (experimental animals)      | <i>Myh11-CreERT2/ROSA26/Confetti</i> : Mixed background                                                  | Male   |
| Mouse   | In house breeding (experimental animals)      | <i>ApoE</i> <sup>-/-</sup> / <i>Myh11-CreERT2/ROSA26/Confetti</i> : Mixed background                     | Male   |
| Mouse   | Noburo Mizushima (Hara T et al., Nature 2006) | <i>Atg5</i> <sup>fl<sup>ox</sup>/fl<sup>ox</sup></sup> : C57Bl/6                                         | Female |
| Mouse   | Jax n°004746                                  | <i>Tagln</i> <sup>Cre+</sup> : C57Bl/6                                                                   | Male   |
| Mouse   | In house breeding (experimental animals)      | <i>Tagln</i> <sup>Cre+</sup> / <i>Atg5</i> <sup>fl<sup>ox</sup>/fl<sup>ox</sup></sup> : C57Bl/6          | Male   |

## Animal breeding

|                        | Species | Vendor or Source                            | Background Strain                                         | Other Information |
|------------------------|---------|---------------------------------------------|-----------------------------------------------------------|-------------------|
| <b>Parent - Male</b>   | Mouse   | In house breeding                           | <i>ApoE</i> <sup>-/-</sup> / <i>Myh11-CreERT2/ROSA26/</i> |                   |
| <b>Parent - Female</b> | Mouse   | Clevers lab (Snippert HJ et al., Cell 2010) | <i>Confetti</i>                                           |                   |

|                        |       |                                               |                                                        |  |
|------------------------|-------|-----------------------------------------------|--------------------------------------------------------|--|
| <b>Parent - Male</b>   | Mouse | Jax n°004746                                  | <i>Tagln</i> <sup>Cre+</sup>                           |  |
| <b>Parent - Female</b> | Mouse | Noburo Mizushima (Hara T et al., Nature 2006) | <i>Atg5</i> <sup>fl<sup>ox</sup>/fl<sup>ox</sup></sup> |  |

**Antibodies**

| <b>Target antigen</b> | <b>Vendor or Source</b>   | <b>Catalog #</b>     | <b>Working concentration</b> | <b>Lot # (preferred but not required)</b> |
|-----------------------|---------------------------|----------------------|------------------------------|-------------------------------------------|
| $\alpha$ SMA          | Sigma                     | C6198                | 5-10 $\mu$ g/ml              |                                           |
| $\alpha$ SMA          | Abcam                     | Ab125057             | 5-10 $\mu$ g/ml              |                                           |
| HMOX1                 | Abcam                     | ab219360             | 5-10 $\mu$ g/ml              |                                           |
| CD68                  | Biorad                    | MCA1957T             | 5-10 $\mu$ g/ml              |                                           |
| LAMP2                 | SantaCruz biotech         | sc-19991             | 5-10 $\mu$ g/ml              |                                           |
| Atg16l1               | Cell signaling technology | 8089                 | 5-10 $\mu$ g/ml              |                                           |
| LC3                   | Cell signaling technology | 3868                 | 5-10 $\mu$ g/ml              |                                           |
| Sqstm1/p62            | Abcam                     | ab207305             | 5-10 $\mu$ g/ml              |                                           |
| Active caspase 3      | Cell signaling technology | 9579                 | 5-10 $\mu$ g/ml              |                                           |
| IRE1 $\alpha$         | Cell signaling technology | 3294                 | 5-10 $\mu$ g/ml              |                                           |
| Ly6G                  | Thermofisher              | 14-5931-82           | 5-10 $\mu$ g/ml              |                                           |
| GRP78/Bip             | Cell signaling technology | 3177                 | 5-10 $\mu$ g/ml              |                                           |
| TAGLN                 | Abcam                     | ab14106              | 5-10 $\mu$ g/ml              |                                           |
| CD45                  | Thermofisher<br>Biolegend | 17-0451-82<br>103139 | 5-10 $\mu$ g/ml              |                                           |
| CD31                  | Thermofisher              | 25-0311-82           | 5-10 $\mu$ g/ml              |                                           |
| CD90.2                | BDbiosciences             | 564365               | 5-10 $\mu$ g/ml              |                                           |
| CD68                  | Biolegend                 | 137021               | 5-10 $\mu$ g/ml              |                                           |
| LAMP2                 | Thermofisher              | 11-1072-81           | 5-10 $\mu$ g/ml              |                                           |
| Ter-119               | Thermofisher              | 11-5921-85           | 5-10 $\mu$ g/ml              |                                           |

**Cultured Cells**

| <b>Name</b>         | <b>Vendor or Source</b> | <b>Sex (F, M, or unknown)</b> |
|---------------------|-------------------------|-------------------------------|
| WT and Atg5 KO SMCs | Primary culture         | Females                       |
|                     |                         |                               |
|                     |                         |                               |
